# Supplementary material
Source: PubMed Central journal article supplement (PMC6265124)

**Supplementary Figure 1.** Post-operative ctDNA Detection Rate According to Blood Collection Time Interval from Surgery

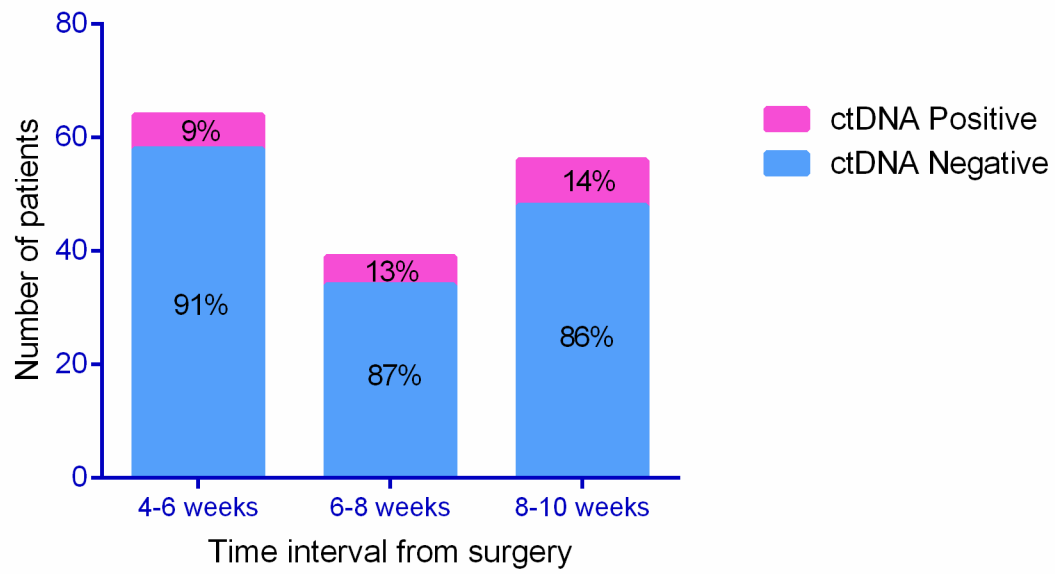

**Supplementary Figure 2.** Serial ctDNA and CEA status for patients (A) with recurrence and (B) without recurrence at last follow-up.

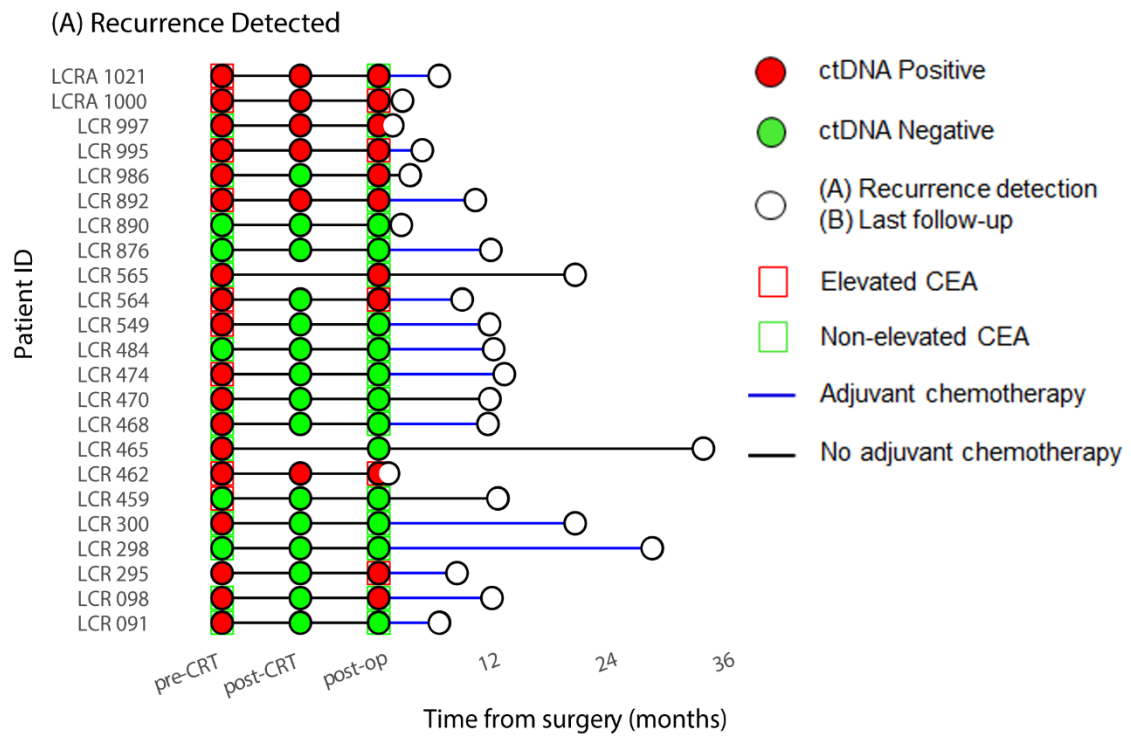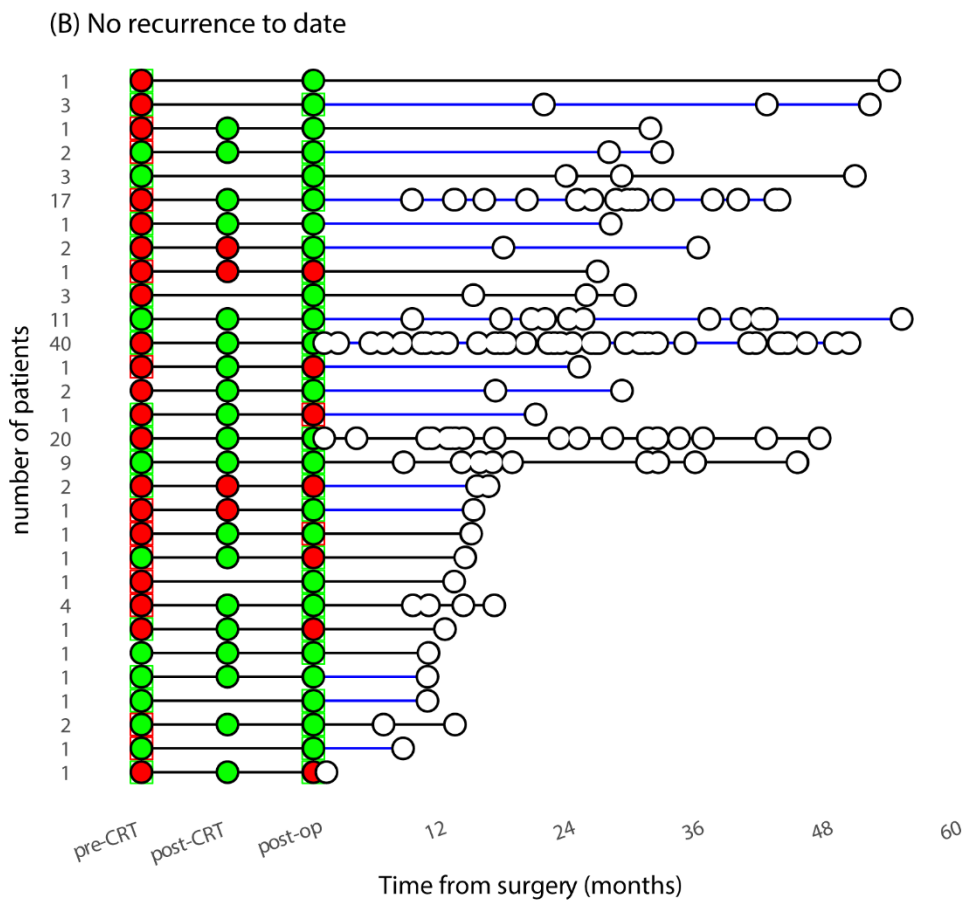

Supplement: NIHMS997196-supplement-Supplementary_Figures.pdf [file NIHMS997196-supplement-Supplementary_Figures.pdf]
